# Supplementary material for: Photocatalytic properties of titania nanostructured films fabricated from titania nanosheets
Source: Royal Society of Chemistry journal article supplement (doi:10.1039/b618448k), 2007-01-01
Supplement: b618448k.pdf [file b618448k.pdf]

# Photocatalytic properties of titania nanostructured films fabricated from titania nanosheets

Tatsuo Shibata, Nobuyuki Sakai, Katsutoshi Fukuda, Yasuo Ebina and Takayoshi Sasaki\*

Nanoscale Materials Center, National Institute for Materials Science, 1-1 Namiki, Tsukuba, Ibaraki

305-0044, Japan

E-mail: sasaki.takayoshi@nims.go.jp

## Electronic Supplementary Information: Fig. S1-3

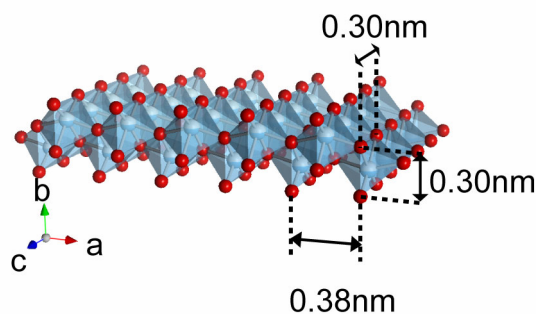

**Figure S1** Schematic representation of nanoarchitecture of titania nanosheet

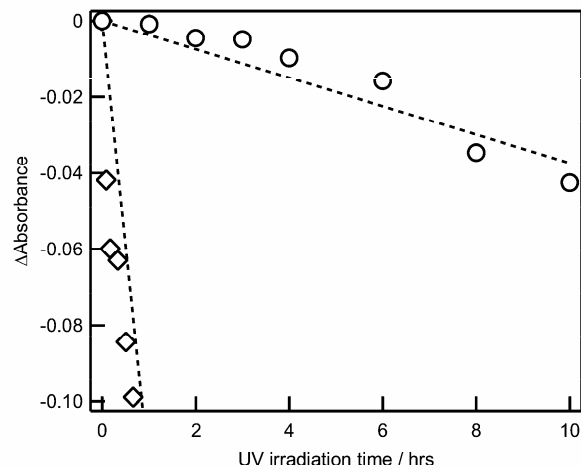

**Figure S2** Changes in absorbance of methylene blue adsorbed on films (under a constant number of absorbed photons: approx.  $6 \times 10^{15}$  quanta  $\text{cm}^{-2} \cdot \text{sec}^{-1}$ ). (○) 1-layer titania nanosheet film; (◇) anatase film prepared by conventional method (NDH-510C, Thickness: about 250 nm).

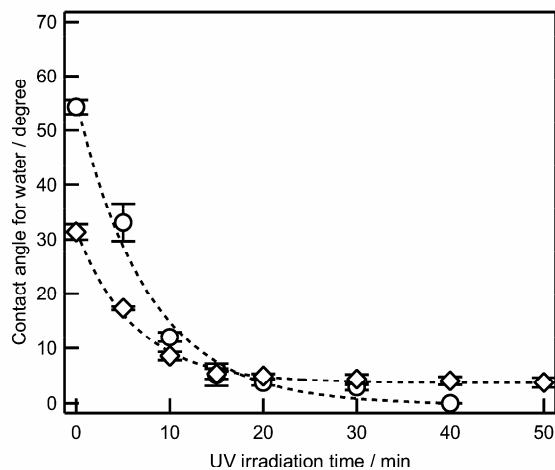

**Figure S3** Changes in water contact angle of films (under a constant number of absorbed photons: approx.  $6 \times 10^{14}$  quanta  $\text{cm}^{-2} \cdot \text{sec}^{-1}$ ). (○) 1-layer titania nanosheet film; (◇) anatase film prepared by conventional method (NDH-510C, Thickness: about 250 nm).
